# Supplementary material for: Acid-base synergistic activation of coal gasification fine slag into hierarchical porous carbon for enhanced Cr(vi) adsorption and reduction
Source: Royal Society of Chemistry journal article supplement (doi:10.1039/d6ra02711c), 2026-05-18
Supplement: d6ra02711c1.pdf [file d6ra02711c1.pdf]

## Acid-Base Synergistic Activation of Coal Gasification Fine Slag into Hierarchical Porous

### Carbon for Enhanced Cr(VI) Adsorption and Reduction

Lijuan Bai<sup>1</sup>, Hua Wang<sup>1,2\*</sup>, Kaipeng Guo<sup>1</sup>, Xia Li<sup>1</sup>, , Kaiwen Bai<sup>1</sup>, Zhengyan Shi<sup>1</sup>, Rui Dang<sup>1</sup>

<sup>1</sup> College of Chemistry and Chemical Engineering, Yulin University, Yulin City 719000, China

<sup>2</sup> Shaanxi Provincial Key Laboratory of Clean Utilization of Low-Modified Coal, Yulin University, Yulin City 719000, China

\*Corresponding author at: College of Chemistry and Chemical Engineering, Yulin University, Chongwen Road No.51, Yulin City 719000, Shaanxi Province, China. E-mail address: 99452715@qq.com (H. Wang)

#### Text S1: FHH model

Based on low-temperature nitrogen adsorption data, the fractal dimension (D) of four samples was calculated using the Frenkel-Halsey-Hill (FHH) fractal model. This parameter reflects the degree of pore formation within the material. D was calculated using Equations (1) and (2) [1]:

$$\ln(V) = b + A \ln \left( \ln \frac{P_0}{P} \right) \quad (1)$$

$$D = A + 3 \quad (2)$$

Where V denotes the adsorption volume of N<sub>2</sub> at equilibrium pressure P, and P<sub>0</sub> represents the saturation pressure of N<sub>2</sub>. A is the power-law exponent associated with the fractal dimension (D), and b is a constant. The value of D ranges from 2 to 3.

#### Text S2: Adsorption kinetic models [2]

$$\text{PFO:} \quad q_t = q_e (1 - e^{-k_1 t}) \quad (3)$$

$$\text{PSO:} \quad q_t = \frac{q_e^2 k_2 t}{1 + q_e k_2 t} \quad (4)$$

$$\text{ID:} \quad q_t = k_{id} t^{1/2} + c \quad (5)$$

$q_e$  (mg/g) denotes the equilibrium adsorption capacity;  $k_1$  (1/min) and  $k_2$  (g/(mg·min)) represent the adsorption rate constants for the PFO and PSO models respectively;  $k_{id}$  (mg/(g·min<sup>1/2</sup>)) indicates the particle internal diffusion coefficient;  $c$  (mg/g) reflects the influence of the boundary layer on the adsorption rate, with higher  $c$  values signifying greater impact.

**Text S3: Adsorption isotherm models [3]**

$$\text{Langmuir:} \quad \frac{C_e}{q_e} = \frac{C_e}{q_m} + \frac{1}{K_L q_m} \quad (6)$$

$$\text{Freundlich:} \quad \ln q_e = \ln K_F + \frac{1}{n} \ln C_e \quad (7)$$

Here,  $q_m$  (mg/g) denotes the maximum adsorption capacity. The constant  $K_L$  (L/mg) represents the Langmuir equilibrium constant. The parameter  $K_F$  (mg/g(L/mg)<sup>1/n</sup>) is the Freundlich constant; a higher  $K_F$  value indicates a stronger adsorption reaction. The variable  $n$  is the Freundlich heterogeneity factor; when  $n > 1$ , it signifies high adsorption efficiency, whereas lower values indicate poor adsorption performance.

**Text S4: Adsorption thermodynamics [4]**

$$K_d = \frac{q_e}{C_e} \quad (8)$$

$$\ln K_d = \frac{\Delta S^\theta}{R} - \frac{\Delta H^\theta}{RT} \quad (9)$$

$$\Delta G^\theta = -RT \ln K_d \quad (10)$$

Here,  $K_d$  denotes the thermodynamic equilibrium constant;  $\Delta H^\theta$  and  $\Delta S^\theta$  are derived from the slope and intercept of  $\ln K_d$  versus  $T^{-1}$ .  $R$  (8.314 J/mol·K) represents the molar gas constant.

**Table S1 Fractal dimensions of FHH model for CGFS, FC and CGFS-H.**

| samples | P/P <sub>0</sub> =0~0.4 |                |                             | P/P <sub>0</sub> =0.4~1 |                |                             |
|---------|-------------------------|----------------|-----------------------------|-------------------------|----------------|-----------------------------|
|         | A <sub>1</sub>          | D <sub>1</sub> | R <sub>1</sub> <sup>2</sup> | A <sub>2</sub>          | D <sub>2</sub> | R <sub>2</sub> <sup>2</sup> |
| CGFS    | -0.1887                 | 2.8113         | 0.9652                      | -0.4705                 | 2.5295         | 0.9992                      |
| CGFS-H  | -0.1723                 | 2.8277         | 0.9415                      | -0.4456                 | 2.5544         | 0.9995                      |
| FC      | -0.1332                 | 2.8668         | 0.9796                      | -0.3190                 | 2.6810         | 0.9904                      |

**Table S2 Carbon microstructure parameters of CGFS and FC.**

| samples | $I_D/I_G$ | $A_{D1}/A_{all}$ | $A_G/A_{all}$ | $A_{(D3+D4)}/A_{all}$ |
|---------|-----------|------------------|---------------|-----------------------|
| CGFS    | 0.6997    | 0.2463           | 0.3520        | 0.4016                |
| FC      | 0.9827    | 0.3223           | 0.3279        | 0.3497                |

**Table S3 pH value changes of various anions before and after adsorption.**

| pH      | Cl <sup>-</sup> | SO <sub>4</sub> <sup>2-</sup> | NO <sub>3</sub> <sup>-</sup> | HPO <sub>4</sub> <sup>2-</sup> | CO <sub>3</sub> <sup>2-</sup> | Without Ion |
|---------|-----------------|-------------------------------|------------------------------|--------------------------------|-------------------------------|-------------|
| Initial | 5.19            | 4.85                          | 4.91                         | 4.43                           | 10.86                         | 5.28        |
| Final   | 5.76            | 5.56                          | 5.57                         | 4.63                           | 10.66                         | 5.92        |

**Table S4 Adsorption kinetic parameters fitted based on PFO, PSO and ID models.**

| models | Parameters                                       | C <sub>0</sub> ,Cr(VI) |
|--------|--------------------------------------------------|------------------------|
|        |                                                  | 100 mg/L               |
| PFO    | q <sub>e,exp</sub> (mg/g)                        | 135.6739               |
|        | q <sub>e,cal</sub> (mg/g)                        | 130.1276               |
|        | k <sub>1</sub> (1/min)                           | 0.0278                 |
|        | R <sup>2</sup>                                   | 0.4114                 |
| PSO    | q <sub>e,cal</sub> (mg/g)                        | 136.3703               |
|        | k <sub>2</sub> (g/mg/min)                        | 0.0073                 |
|        | R <sup>2</sup>                                   | 0.9944                 |
|        | k <sub>id,1</sub> (mg/(g · min <sup>1/2</sup> )) | 1.5375                 |
| ID     | c <sub>1</sub>                                   | 94.7002                |
|        | R <sup>2</sup>                                   | 0.9772                 |
|        | k <sub>id,2</sub> (mg/(g · min <sup>1/2</sup> )) | 0.3564                 |
|        | c <sub>2</sub>                                   | 120.2107               |
|        | R <sup>2</sup>                                   | 0.9029                 |

**Table S5 Adsorption isotherm parameter of Cr(VI) by FC.**

| models     | Parameters                            | Temperature |          |          |
|------------|---------------------------------------|-------------|----------|----------|
|            |                                       | 298 K       | 308 K    | 318 K    |
| Langmuir   | $q_m$ (mg/g)                          | 172.7115    | 173.9130 | 179.8561 |
|            | $K_L$                                 | 0.1170      | 0.1339   | 0.1513   |
|            | $R^2$                                 | 0.9871      | 0.9859   | 0.9902   |
| Freundlich | $K_F(\text{mg/g}(\text{L/mg})^{1/n})$ | 69.0361     | 75.6290  | 80.4310  |
|            | $n$                                   | 5.3444      | 5.8685   | 5.9684   |
|            | $R^2$                                 | 0.9164      | 0.9065   | 0.9483   |

**Table S6 Comparison of the adsorption capacity of FC and other adsorbents for Cr(VI).**

| Adsorbent                                                     | Temperature (K) | $q_{\max}$ (mg/g) | Reference  |
|---------------------------------------------------------------|-----------------|-------------------|------------|
| NiCo-LDHM                                                     | 298 K           | 132.00            | [5]        |
| PACFs                                                         | 298 K           | 93.20             | [6]        |
| Al/BC                                                         | 298 K           | 176.23            | [7]        |
| Fe <sub>3</sub> O <sub>4</sub> @SiO <sub>2</sub> -UiO-66-EDTA | 298 K           | 75.11             | [8]        |
| FC                                                            | 298 K           | 172.71            | This study |

**Table S7 Adsorption thermodynamic parameter.**

| T (K) | $\Delta G^\theta$ (KJ/mol) | $\Delta H^\theta$ (KJ/mol) | $\Delta S^\theta$ ((J/(mol·K)) |
|-------|----------------------------|----------------------------|--------------------------------|
| 298   | -7.674                     |                            |                                |
| 308   | -8.476                     | 17.663                     | 84.974                         |
| 318   | -9.376                     |                            |                                |

**Table S8 Specific surface area and pore distribution of FC and FC-Cr(VI)**

| samples   | Specific surface area<br>(m <sup>2</sup> /g) | Micropore surface area<br>(m <sup>2</sup> /g) | Mesopore Surface area<br>(m <sup>2</sup> /g) | Total pore volume<br>(cm <sup>3</sup> /g) |
|-----------|----------------------------------------------|-----------------------------------------------|----------------------------------------------|-------------------------------------------|
| FC        | 630.308                                      | 63.794                                        | 250.078                                      | 0.728                                     |
| FC-Cr(VI) | 151.577                                      | 0.000                                         | 73.918                                       | 0.205                                     |

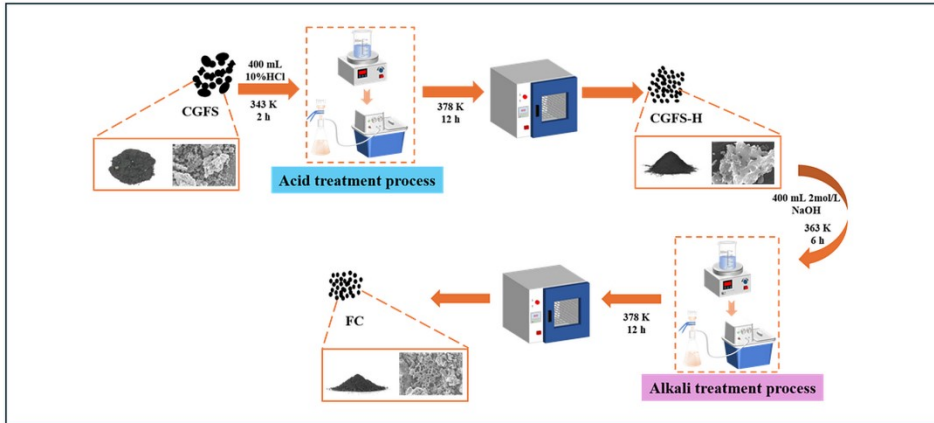

Figure S1. Schematic diagrams of the preparation processes for FC and CGFS-H

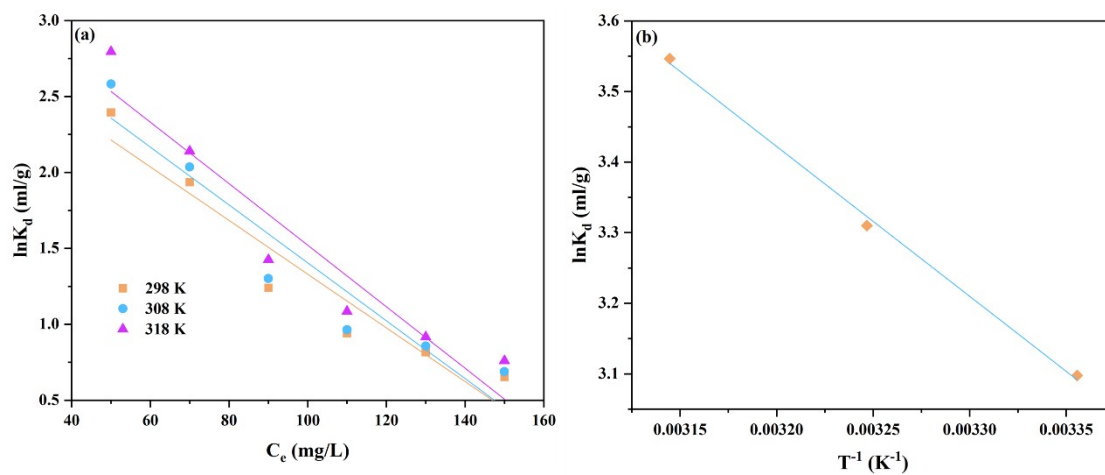

**Figure S2 (a)**The relationship curve between  $\ln K_d$  and  $C_e$ ; **(b)**The relationship curve between  $\ln K_d$  and  $T^{-1}$

**Figure S3 (a) N<sub>2</sub> adsorption-desorption isotherms of FC and FC-Cr(VI); (b) pore size distribution**

## References

- [1] X. Li, Q. Wu, D. Chen, R.S. Tamjidur, P. Fan, G. Wang, W. Zhang, Efficient chromium Cr (VI) removal from wastewater through modified cycad's leaf biochar: insights into adsorption-reduction mechanisms and kinetic analysis, *Biomass and Bioenergy* 200 (2025) 107994.
- [2] F. Liu, Y. Luo, B. Hu, Simultaneous elimination of U(VI) and Eu(III) by phytic acid decorated MXenes@MOFs composites in water: Performance, kinetics and mechanism, *Separation and Purification Technology* 327 (2023) 124912.
- [3] H. Ji, H. Wang, Q. Yang, X. Xie, D. Wang, B. Wu, Simultaneous removal of Cr(VI), Cd(II) and As(III) in groundwater by ZVI-biochar based composite: Synergy, performance and mechanism, *Process Safety and Environmental Protection* 201 (2025) 107460.

- [4] L. Mingzhe, Y. Zhang, L. Xiaoyan, Performance and mechanism of uranium (VI) removal from aqueous solution by zero-valent nickel@hollow glass particles (ZVNi@HGP), *Physica Scripta* 99 (2024) 075961.
- [5] M. Li, X. Chen, J. He, S. Liu, Y. Tang, X. Wen, Porous NiCo-LDH microspheres obtained by freeze-drying for efficient dye and Cr(VI) adsorption, *Journal of Alloys and Compounds* 976 (2024) 173107.
- [6] S.B. Kim, M. Kim, J. Lee, H. Choi, S.Y. Lee, S.J. Park, Impact of pore structure in pitch-based activated carbon fibers on Cr(VI) adsorption behaviors, *Applied Surface Science Advances* 29 (2025) 100835.
- [7] Z. Yang, H. Wu, X. Yan, D. Bekchanov, D. Kong, X. Su, Preparation of Al-doped carbon materials derived from artificial potassium humate prepared from waste cotton cloth and their excellent Cr(VI) adsorption performance, *Colloids and Surfaces A: Physicochemical and Engineering Aspects* 699 (2024) 134721.
- [8] B. Hou, X. Yang, L. Wang, T. Shi, M. Akram, L. Wang, J. Wan, B. Gao, J. Pan, Fe doping enhanced Cr(VI) adsorption efficiency of cerium-based adsorbents: Adsorption behaviors and inner removal mechanisms, *Journal of Colloid and Interface Science* 67 (2024).
